# Supplementary material
Source: PubMed Central journal article supplement (PMC8983835)
Supplement: mmc1.pdf [file mmc1.pdf]

**Supplemental information**

**Augmentation of humoral and cellular immune  
responses after third-dose SARS-CoV-2 vaccination  
and viral neutralization in myeloma patients**

**Adolfo Aleman, Oliver Van Oekelen, Bhaskar Upadhyaya, Katherine Beach, Ariel Kogan Zajdman, Hala Alshammary, Kseniya Serebryakova, Sarita Agte, Katerina Kappes, Charles R. Gleason, Komal Srivastava, PVI/MM/Seronet Study Group, Steve Almo, Carlos Cordon-Cardo, Florian Krammer, Miriam Merad, Sundar Jagannath, Ania Wajnberg, Viviana Simon, and Samir Parekh**

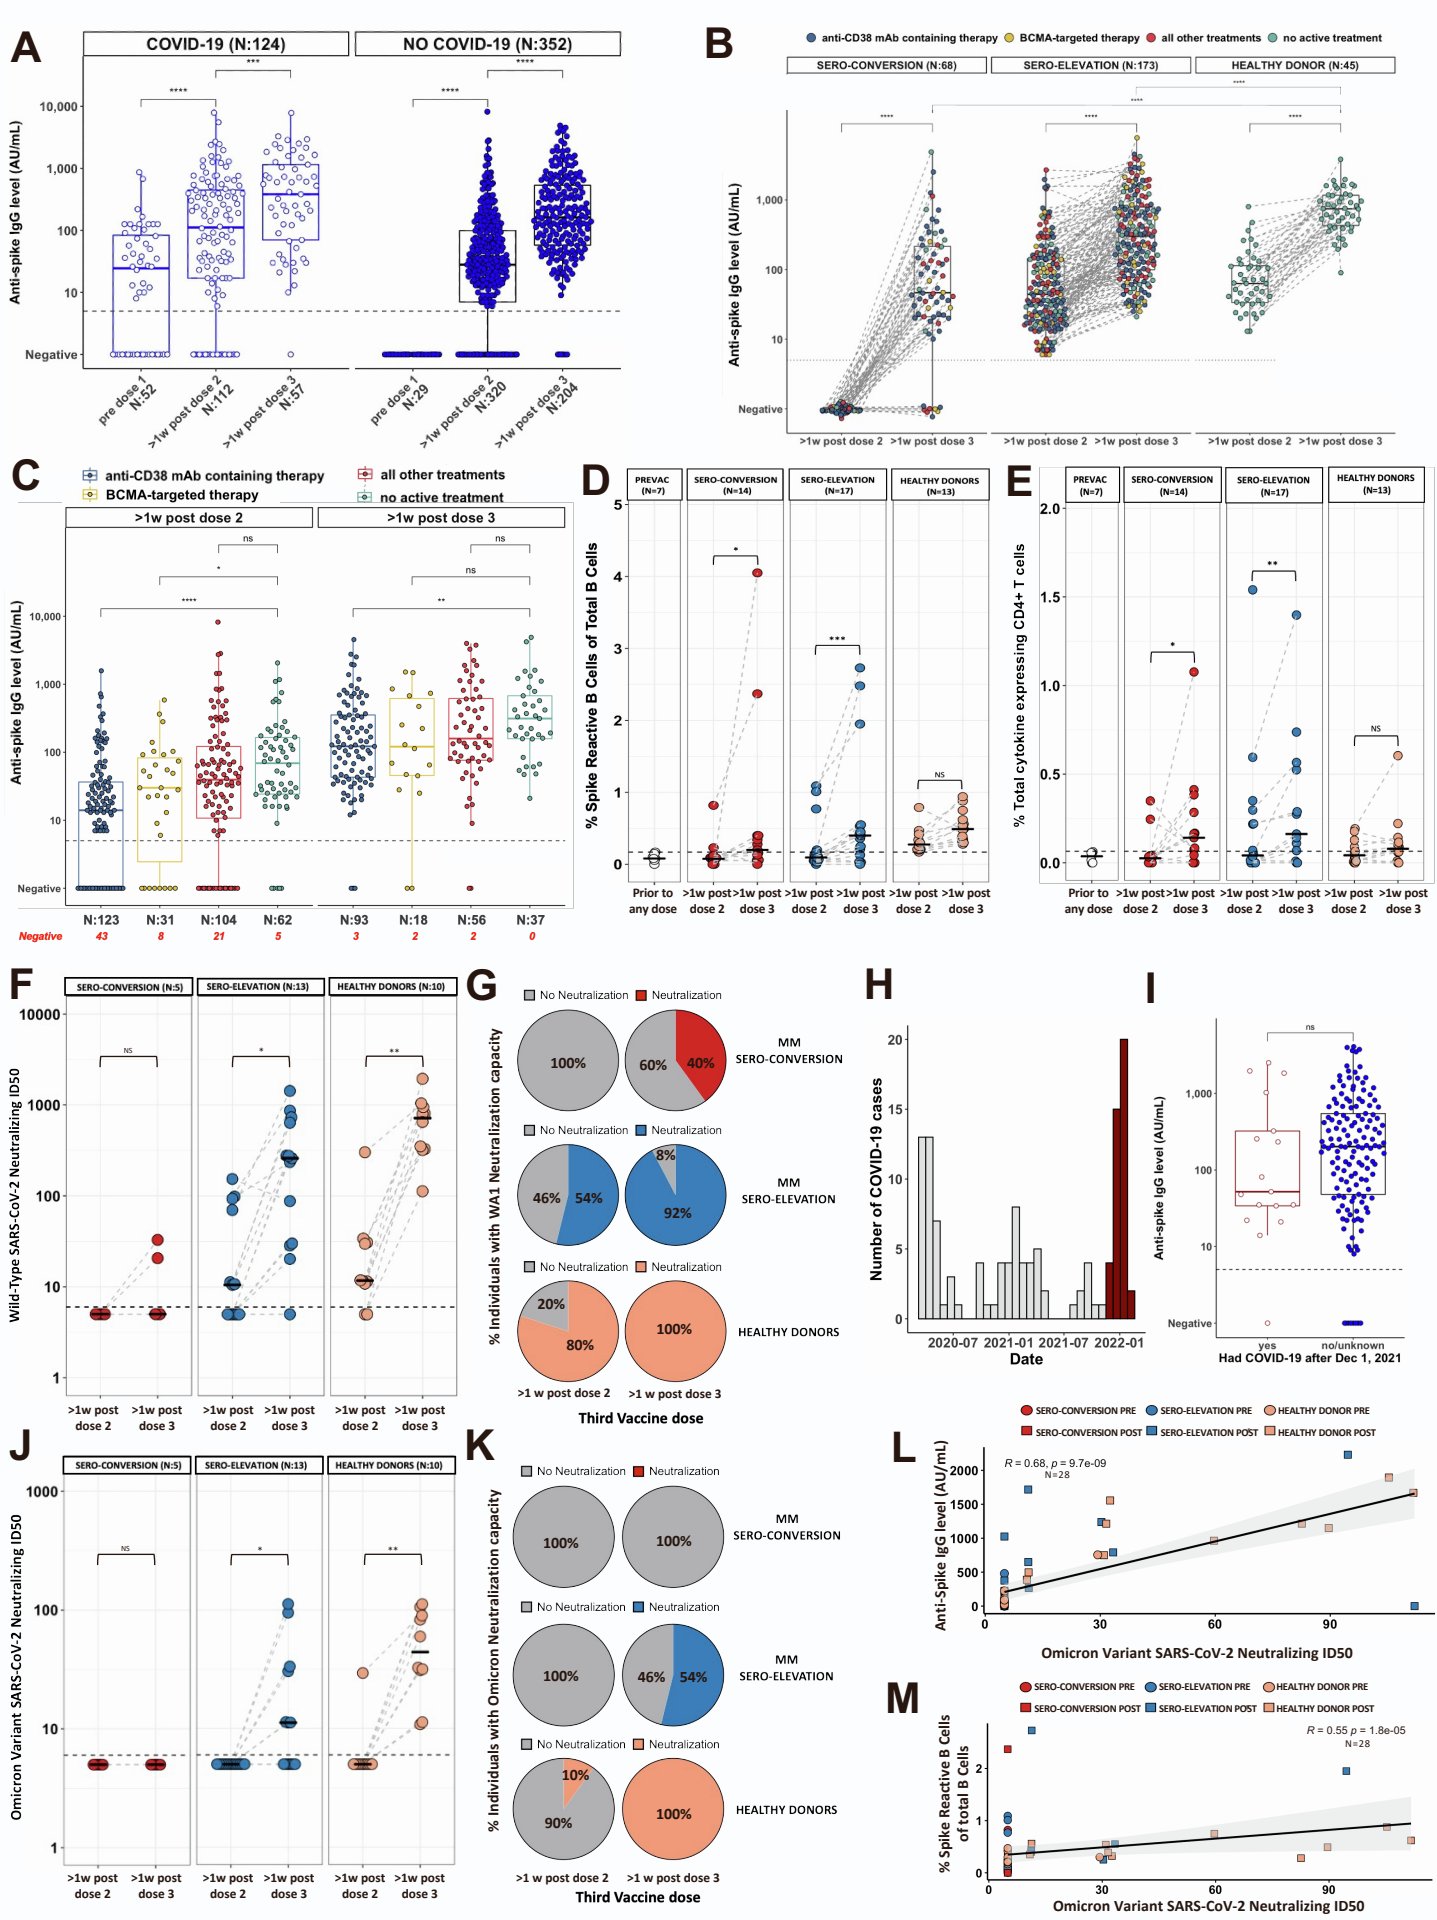

1 **Supplemental Figure S1. Humoral and cellular responses to SARS-CoV-2**  
2 **vaccination in patients with multiple myeloma. (A)** Time course of anti-SARS-CoV-2  
3 spike (S) IgG antibody levels in multiple myeloma (MM) patients split by COVID-19  
4 infection status. Antibody concentrations measured in artificial units per mL (AU/mL) and  
5 are depicted on a log-10 scale. The horizontal dotted line indicates the lower limit of  
6 detection (5 AU/mL). **(B)** Effect of SARS-CoV-2 third vaccination on anti-S IgG antibody  
7 levels in MM patients and age-matched healthy donors (HD). Dots are colored to indicate  
8 treatment regimen at the time of vaccination. Antibody concentrations measured in  
9 artificial units per mL (AU/mL) and are depicted on a log-10 scale. The horizontal dotted  
10 line indicates the lower limit of detection (5 AU/mL). **(C)** Anti-S IgG antibody levels at least  
11 7 days after receiving two doses of SARS-CoV-2 mRNA vaccine and at least 7 days after  
12 receiving three doses of SARS-CoV-2 mRNA vaccine in MM patients split according to  
13 major treatment groups. None of the depicted patients in this panel developed COVID-19  
14 at any point during the pandemic. Antibody concentrations measured in artificial units per  
15 mL (AU/mL) and are depicted on a log-10 scale. The horizontal dotted line indicates the  
16 lower limit of detection (5 AU/mL). **(D)** Frequencies of SARS-CoV-2 spike-reactive B cells  
17 in different cohorts within the CD19<sup>+</sup> gate. The horizontal dotted line indicates the highest  
18 observed frequency of total spike-reactive B cells in the unvaccinated HD control cohort.  
19 The bold horizontal line indicates the median for each group. **(E)** SARS-CoV-2 specific  
20 CD4<sup>+</sup> T cell responses in MM patients and HD. Total cytokine-expressing CD4<sup>+</sup> T cells  
21 were estimated by aggregating activated CD4<sup>+</sup> T cells producing GM-CSF, IFN- $\gamma$ , IL-2,  
22 IL-4, IL-17, and TNF- $\alpha$ . Frequencies were calculated by subtracting water control  
23 frequencies from the CD4<sup>+</sup> T cell response for each subject. The horizontal dotted line

24 indicates highest observed frequency of total cytokine response in the unvaccinated HD  
25 control cohort. The bold horizontal line indicates the median for each group. **(F)**  
26 Neutralizing antibody ID50 to WA1 wild-type SARS-CoV-2 strain for MM subject groups  
27 and HD. The bold horizontal line indicates the median for each group. **(G)** Quantification  
28 of MM patients and HD that achieve neutralization to the WA1, wildtype strain >1 week  
29 post dose 2 and >1 week post dose 3. **(H)** Histogram representing COVID-19 infection  
30 cases in MM patients at Mount Sinai Hospital between March 2020 and January 2021.  
31 Dark red overlay indicates cases during the period when the Omicron variant was  
32 dominant in New York. **(I)** Anti-S IgG antibody levels in MM patients that contracted  
33 COVID-19 during the period where the Omicron variant was dominant in New York  
34 compared to non-infected MM patients. Antibody concentrations measured in artificial  
35 units per mL (AU/mL) and are depicted on a log-10 scale. The horizontal dotted line  
36 indicates the lower limit of detection (5 AU/mL). **(J)** Neutralizing antibody ID50 to Omicron  
37 SARS-CoV-2 strain for MM subject groups and HD. The bold horizontal line indicates the  
38 median for each group. **(K)** Quantification of MM patients and HD that achieve  
39 neutralization to Omicron strain >1 week post dose 2 and >1 week post dose 3. **(L)**  
40 Spearman's rank correlation between anti-S IgG antibody levels and WA1, wildtype  
41 neutralizing ID50. **(M)** Spearman's rank correlation between anti-S IgG antibody levels  
42 and Omicron variant neutralizing ID50. The lower and upper hinges of the boxplot  
43 correspond to the first and third quartiles (the 25<sup>th</sup> and 75<sup>th</sup> percentiles) with a bold  
44 horizontal line indicating the median. Vertical whiskers are extended up to 1.5 times the  
45 interquartile range (IQR). P-values represent comparison using the non-parametric

- 46 Mann-Whitney U test. P-values for contingency outcomes represent comparison using
- 47 Fisher's exact test; (ns)  $p > 0.05$ , (\*)  $p < 0.05$ , (\*\*)  $p < 0.01$ , (\*\*\*)  $p < 0.001$ , (\*\*\*\*)  $p < 0.0001$ .

48 **Supplemental Table S1. Clinical characteristics of patients with multiple myeloma and**  
 49 **healthy donor controls.**

| VARIABLE                                                                                                                                                                                                                                                                                                                                                                                                                                                                                            | MM COHORT<br>(N = 476) |          | HD<br>(N=45) |           |
|-----------------------------------------------------------------------------------------------------------------------------------------------------------------------------------------------------------------------------------------------------------------------------------------------------------------------------------------------------------------------------------------------------------------------------------------------------------------------------------------------------|------------------------|----------|--------------|-----------|
| Age (y)                                                                                                                                                                                                                                                                                                                                                                                                                                                                                             | 67                     | [38-96]  | 58           | [49-71]   |
| Male gender                                                                                                                                                                                                                                                                                                                                                                                                                                                                                         | 56.7%                  | (270)    | 24%          | (11)      |
| Vaccine Type Initial Dose                                                                                                                                                                                                                                                                                                                                                                                                                                                                           |                        |          |              |           |
| Pfizer-BioNTech                                                                                                                                                                                                                                                                                                                                                                                                                                                                                     | 70.6%                  | (336)    | 73%          | (33)      |
| Moderna                                                                                                                                                                                                                                                                                                                                                                                                                                                                                             | 29.4%                  | (140)    | 27%          | (12)      |
| Received ≥2 documented doses                                                                                                                                                                                                                                                                                                                                                                                                                                                                        | 99.2%                  | (472)    | 100%         | (45)      |
| Received ≥3 documented doses                                                                                                                                                                                                                                                                                                                                                                                                                                                                        | 72.5%                  | (345)    | 100%         | (45)      |
| Timing of dose 3 after dose 2 (d)                                                                                                                                                                                                                                                                                                                                                                                                                                                                   | 207                    | [41-360] | 280          | [208-361] |
| Heterologous vaccination regimen                                                                                                                                                                                                                                                                                                                                                                                                                                                                    | 5.8%                   | (20/345) | 4%           | (2)       |
| Had documented COVID-19                                                                                                                                                                                                                                                                                                                                                                                                                                                                             | 26.1%                  | (124)    | 44%          | (20)      |
| <b>Disease Isotype</b>                                                                                                                                                                                                                                                                                                                                                                                                                                                                              |                        |          |              |           |
| IgG                                                                                                                                                                                                                                                                                                                                                                                                                                                                                                 | 60.1%                  | (286)    |              |           |
| IgA                                                                                                                                                                                                                                                                                                                                                                                                                                                                                                 | 20.2%                  | (96)     |              |           |
| LC                                                                                                                                                                                                                                                                                                                                                                                                                                                                                                  | 18.9%                  | (90)     |              |           |
| Other                                                                                                                                                                                                                                                                                                                                                                                                                                                                                               | 0.8%                   | (4)      |              |           |
| SMM                                                                                                                                                                                                                                                                                                                                                                                                                                                                                                 | 8.4%                   | (40)     |              |           |
| Time since diagnosis (mo)                                                                                                                                                                                                                                                                                                                                                                                                                                                                           | 64.9                   | [0-254]  |              |           |
| > 3 previous lines of treatment                                                                                                                                                                                                                                                                                                                                                                                                                                                                     | 28.2%                  | (134)    |              |           |
| > 5 previous lines of treatment                                                                                                                                                                                                                                                                                                                                                                                                                                                                     | 16.2%                  | (77)     |              |           |
| <b>Disease response status</b>                                                                                                                                                                                                                                                                                                                                                                                                                                                                      |                        |          |              |           |
| CR or sCR                                                                                                                                                                                                                                                                                                                                                                                                                                                                                           | 40.5%                  | (193)    |              |           |
| VGPR                                                                                                                                                                                                                                                                                                                                                                                                                                                                                                | 17.6%                  | (84)     |              |           |
| PR or MR                                                                                                                                                                                                                                                                                                                                                                                                                                                                                            | 8.2%                   | (39)     |              |           |
| SD or PD                                                                                                                                                                                                                                                                                                                                                                                                                                                                                            | 19.1%                  | (91)     |              |           |
| Unable to assess                                                                                                                                                                                                                                                                                                                                                                                                                                                                                    | 14.3%                  | (68)     |              |           |
| <b>Treatment regimen at initial vaccination contains:</b>                                                                                                                                                                                                                                                                                                                                                                                                                                           |                        |          |              |           |
| Immunomodulatory drug                                                                                                                                                                                                                                                                                                                                                                                                                                                                               | 46.2%                  | (220)    |              |           |
| Proteasome inhibitor                                                                                                                                                                                                                                                                                                                                                                                                                                                                                | 6.1%                   | (29)     |              |           |
| Anti-CD38 mAb                                                                                                                                                                                                                                                                                                                                                                                                                                                                                       | 40.3%                  | (192)    |              |           |
| Anti-SLAMF7 mAb                                                                                                                                                                                                                                                                                                                                                                                                                                                                                     | 5.0%                   | (24)     |              |           |
| BCMA-targeted therapy                                                                                                                                                                                                                                                                                                                                                                                                                                                                               | 10.7%                  | (51)     |              |           |
| BCMA-targeted bispecific                                                                                                                                                                                                                                                                                                                                                                                                                                                                            | 3.4%                   | (16)     |              |           |
| CAR T cell therapy                                                                                                                                                                                                                                                                                                                                                                                                                                                                                  | 6.1%                   | (29)     |              |           |
| Other BCMA-targeted therapy                                                                                                                                                                                                                                                                                                                                                                                                                                                                         | 1.3%                   | (6)      |              |           |
| Other bispecific (non-BCMA)                                                                                                                                                                                                                                                                                                                                                                                                                                                                         | 4.2%                   | (20)     |              |           |
| Other therapy (incl. venetoclax, selinexor, alkylators)                                                                                                                                                                                                                                                                                                                                                                                                                                             | 8.2%                   | (39)     |              |           |
| Previous ASCT                                                                                                                                                                                                                                                                                                                                                                                                                                                                                       | 49.8%                  | (237)    |              |           |
| ASCT < 12 mo before dose 1                                                                                                                                                                                                                                                                                                                                                                                                                                                                          | 6.3%                   | (30)     |              |           |
| No active treatment                                                                                                                                                                                                                                                                                                                                                                                                                                                                                 | 19.3%                  | (92)     |              |           |
| <b>Note:</b> values are presented as percentage (n) or median [range]. Disease response status and treatment regimen were registered at the date of administration of the first dose of mRNA vaccine.                                                                                                                                                                                                                                                                                               |                        |          |              |           |
| <b>Abbreviations:</b> y, years; mo, months; COVID-19, coronavirus disease 2019; Ig, immunoglobulin; MM, multiple myeloma; SMM, smoldering multiple myeloma; HD, healthy donor; CR, complete response; sCR, stringent complete response; VGPR, very good partial response; PR, partial response; MR, minimal response; SD, stable disease; PD; progressive disease; ASCT, autologous stem cell transplant; mAb, monoclonal antibody; BCMA, B-cell maturation antigen; CAR, chimeric antigen receptor |                        |          |              |           |

51 **Supplemental Materials and Methods:**

52

53 **Study information and patient selection.** Multiple myeloma (MM) patients: The serology study  
54 cohort consisted of 476 patients with and without previously documented COVID-19 pooled from  
55 two different non-interventional Institutional Review Board (IRB) approved study protocols at The  
56 Icahn School of Medicine at Mount Sinai. A total of 279 MM patients were enrolled after obtaining  
57 written informed consent for the MARS study, an ongoing longitudinal study at our institution (IRB-  
58 16-00791). Patients had blood and saliva taken for analysis at multiple time points before or after  
59 administration of the SARS-CoV-2 mRNA vaccine. All specimens were coded prior to processing  
60 and antibody testing for all serum specimen was performed in a blinded manner. All participants  
61 with, at least, one post vaccine antibody data point available at the time of writing this report were  
62 included in the analysis. The remaining 197 MM patients were identified under a retrospective  
63 study (IRB: GCO#: 11-1433) by conducting a chart review for patients at our MM clinic who had  
64 SARS-CoV-2 spike IgG results at various time points around SARS-CoV-2 mRNA vaccine  
65 administration. Chart review was conducted to retrieve patient clinical characteristics.

66

67 All 31 MM patients used in cellular and neutralization assays consented to enrollment in the MARS  
68 clinical trial IRB: 16-00791. The study was approved by the Program for Protection of Human  
69 Subject an Institutional Review Board approved research study. Peripheral blood was collected  
70 in heparin green tops (Cat#362761), BD Vacutainer CPT (Cat#367985) and BD SST™ Serum  
71 Separation Tubes (Cat#0268396) via venipuncture according to trial schedule. Peripheral blood  
72 mononuclear cells (PBMC) were Ficoll density separated and cryopreserved by the MARS  
73 processing team. Cryopreserved PBMC samples were used to Flow Cytometry analysis. Sera  
74 isolated from blood was used to SARS-CoV-2 antibody ELISA and neutralizing assay.

75

76 Healthy donors (HD) group: 13 participants of the PARIS (Protection Associated with Rapid  
77 Immunity to SARS-CoV-2) study were selected as controls to best match the demographics of  
78 the 31 MM patient population. The PARIS cohort follows health care workers longitudinally to  
79 assess the durability and effectiveness of SARS-CoV-2 immune responses. The study was  
80 reviewed and approved by the Mount Sinai Hospital Institutional Review Board (IRB-20-03374).  
81 All participants provided written informed consent prior to collection of data and specimen.

82

83 Both studies were carried out in compliance with the Declaration of Helsinki and International  
84 Conference on Harmonization Guidelines for Good Clinical Practice. Chart review was conducted  
85 to retrieve patient clinical characteristics. Anti-SARS-CoV-2 antibody testing was performed using  
86 an anti-IgG assay developed at Mount Sinai Health System Department of Pathology in  
87 collaboration with the Icahn School of Medicine at Mount Sinai Department of Microbiology under  
88 a Food and Drug Administration (FDA) Emergency Use Authorization.

89

90 **SARS-CoV-2 antibody ELISA.** Antibodies to SARS-CoV-2 spike were detected using an  
91 established quantitative two-step ELISA termed Mount Sinai Antibody test described in detail in  
92 the referenced manuscripts.(Stadlbauer et al., 2020; Stadlbauer et al., 2021) The assay shows a  
93 performance of 100% specificity and 95% sensitivity in in-house evaluation.

94

95 **Flow cytometry assay to detect SARS-CoV-2 spike-reactive B cells.** SARS-CoV-2 spike-  
96 reactive B cells were detected with a in house antibody panel (Panel A) developed to  
97 simultaneously detect spike-reactive B cells along with immunophenotyping of myeloid and  
98 lymphoid cells in peripheral blood. Recombinant spike protein used is known as OptSpike1  
99 which is cloned into the mammalian expression vector pCAGGS and includes the majority of the  
100 ectodomain (OptSpike1: AAs 1–1208). Spike protein purification and production described in  
101 detail in the referenced manuscript. (Herrera et al., 2021) Strategy to detect spike-reactive B



102 cells have been described in our previous report (Aleman et al., 2021). Thawed PBMC were  
103 initially stained with Live/Dead Fixable Blue Dead Cell Stain Kit (L23105, Thermofisher  
104 Scientific) for 15 minutes at room temperature. Viability dye stained PBMC were further stained  
105 with Panel A in multiple staining steps at different temperatures. PBMC were stained at room  
106 temperature for 15 minutes with a cocktail of 14 antibodies, washed and further stained with  
107 spike protein for 30 mins on ice. Post spike protein staining PBMC were washed and stained on  
108 ice for 30 minutes with equal amounts of anti-Strep II-FITC and anti-Strep II-Biotin antibodies  
109 (A01736, A01737, GeneScript) at a dilution of 1:150. Washed PBMC were further stained with a  
110 cocktail of remaining antibodies in Panel A including APC labeled Streptavidin (BioLegend) for  
111 30 minutes on ice. Antibodies in Panel A stained at room temperature include CCR6-BUV496  
112 (clone 11Ag), CD45RA-BUV563 (clone HI100), CD28-BUV737 (clone 28.2) (all from BD  
113 Biosciences ), TCR gamma-delta-PerCP-eFluor710 (clone B1.1, Thermofisher), CCR7-BV421  
114 (clone G043H7), CXCR3-BV510 (clone G025H7), CD27-BV570 (clone O323), CXCR5-BV605  
115 (clone J25D4), CRTH2-BV711(clone BM16),PD-1-BV750 (clone EH12.1H7),CD25-PE (clone M-  
116 A251), CD66b-PE-Dazzle 594 (clone QA17A51), CCR4-PE-FIRE 810 (clone L291H4), CD11c-  
117 Alexa700 (clone Bu15) (all from BioLegend). Antibodies in Panel A stained on ice include CD4-  
118 BUV395 (clone SK3), CD56-BUV615 (clone NCAM16.2), HLA-DR-BUV661 (clone G46-6), CD3-  
119 BUV805 (clone UCHT1), CD20-BV480 (clone 2H7) (all from BD Biosciences), CD1c-  
120 SuperBright 436 (clone L161), CD123-eFluor450 (clone 6H6), CD8-NFB555 (clone OKT8),  
121 CD19-NFB610-70S (clone HIB19), CD14-NFB660-40S (clone MEM-15), CD127-PE-Cy5.5  
122 (clone eBioRDR5), CD16-NFR685 (clone 3G8) (all from Thermofisher), IgM-BV650 (clone  
123 MHM-88), IgD-BV785(IA6-2), CD11b-PerCP (clone M1/70), CD57-PerCP-Cy5.5 (clone HNK-1),  
124 CD24-PE-Cy5 (clone ML5), IgG Fc-PE-Cy7 (clone M1310G05) CD38-APC-FIRE810 (clone  
125 HIT2) (all from BioLegend), IgA-APC-VIO770 (clone IS11-8E10, Miltenyi Biotec) Anti-Strep II-  
126 FITC, Anti-Strep II-Biotin. Each antibody was used at a dilution of 1:25. All antibody cocktail  
127 preparations included True-Stain Monocyte buffer (Biolegend), CellBlox Monocyte and

128 Macrophage blocking buffer (Thermofisher) and Super Bright Complete Staining buffer  
129 (Thermofisher) at a dilution of 1:20 to avoid nonspecific dye-dye and dyes to cell interaction.  
130 Cells were acquired on Cytex Aurora Flow Cytometer (Cytex Biosciences). Flow data was  
131 compensated on Cytex Aurora acquisition software SpectroFlo and compensated .fcs files were  
132 exported to Flowjo software (BD Biosciences) for analysis. Supervised hierarchal gating was  
133 employed to delineate major cell types and identify spike-reactive B cells in PBMC. Total cells  
134 were initially gated to remove dead cells, doublets and CD66b+ cells. From the live CD66b  
135 negative cell gate monocytes were identified based on expression of markers CD16 and CD14  
136 (CD16hi/-CD14-/+). Monocyte-negative cells were sequentially gated for markers CD1c, CD123  
137 and CD19 (CD1c vs CD123 followed by CD1c vs CD19 on CD123- cells) to identify  
138 plasmacytoid dendritic cells (pDC, CD123+CD1c-) and conventional dendritic cells (cDC,  
139 CD123-CD19-CD1c+). pDC and cDC negative cell fraction was gated for CD3 and CD38 to  
140 identify total T cells (CD3+CD38+/-). Subsequently B cells were identified from the CD3  
141 negative gate as cells expressing HLADR and CD19 (CD19+HLADR+/-). As described in our  
142 previous report (Aleman *et al.*, 2021), B cells showing fluorescent signals for both Strep-II-FITC  
143 and Strep-II-Biotin-Streptavidin-APC were classified as spike-reactive B cells. Finally, B cell-  
144 negative cells were plotted as CD56 vs CD16 to identify NK cells (CD56hiCD16- and  
145 CD56dimCD16+ NK cells). PBMC from healthy donors prior to any SARS-CoV-2 vaccination or  
146 SARS-CoV-2 exposure were stimulated similarly and were used as a control group.

147

148 **Intracellular cytokine staining flow cytometry (ICS-Flow) T cell assay.** T cell assays were  
149 carried out in RPMI supplemented with 10% Human Ab serum (R&D Systems), 1x glutamax  
150 (Lonza) 1x Penicillin-Streptomycin. PBMC were stimulated for 6 hours with a pool of spike  
151 peptides (15-mer sequences with 11 amino acids overlap spanning the entire spike protein,  
152 Miltenyi Biotec) at concentrations recommended by the manufacturer or with water as control  
153 along with co-stimulators for CD28 and CD49d (i.e., anti-CD28 clone CD28.1 and anti-CD49d

154 clone 9F109, both from Biolegend). Culture conditions also included antibodies to detect CD4  
155 activation marker CD154 and CD8 degranulation marker CD107 (CD154-PE, clone 24-31 and  
156 CD107a-FITC, clone H4A3 both from BioLegend) and Monensin (BioLegend). Stimulations with  
157 Staphylococcal enterotoxin B (SEB) were used as positive control. Post stimulation cells were  
158 washed and stained with Live/Dead Fixable Blue Dead Cell Stain Kit for 15 minutes at room  
159 temperature followed by surface staining with a cocktail of antibodies comprising of CD3- BUV805  
160 (clone UCHT1), CD4-BUV395 (clone SK3), CD8-BUV496 (clone RPA-T8), CD45RA-BUV563  
161 (clone HI100), PD-1-BUV615 (clone EH12.1), HLA-DR-BUV661 (clone G46-6) (all from BD  
162 Biosciences,) CCR7-BV510 (clone G043H7), CD27-BV570 (clone O323), CD69-BV605 (clone  
163 FN50), CD200-BV711 (clone OX-104), CXCR5-BV785 (clone J252D4), ICOS-PE-Dazzle594  
164 (clone QA17A51), OX40-PE-Cy5 (clone Ber-ACT35) 4-1bb-APC-Fire750 (clone 4B4-1) (all from  
165 BioLegend) and CD19-NFB610-70S (clone HIB19). After surface marker staining cells were fixed  
166 with 4% paraformaldehyde (PFA) and permeabilized with BD perm buffer (BD Biosciences) and  
167 stained with a cocktail of antibodies to cytokines IL-4 (IL-4-BUV737, clone MP4-25D2), IL-17 (IL-  
168 17-BV650, clone N49-653) (both from BD Biosciences ), IFN-g (IFN-g-BV421, clone B27), TNF-  
169 a (TNF-a-PE-Cy7, clone MaB11), IL-2 (IL-2-APC, clone MQ1-17H12) and GM-CSF (GM-CSF-  
170 PerCP-Cy5.5) (all from BioLegend). The cells were acquired on Cytex Aurora Flow Cytometer.  
171 Flow data was compensated on Cytex Aurora acquisition software SpectroFlo and compensated  
172 .fcs files were exported to Flowjo software (BD Biosciences) for analysis. Data was gated to  
173 exclude dead cells and doublets and then further gated on forward scatter (FSC-A) vs side scatter  
174 (SSC-A) plot to identify lymphocytes. CD3 vs CD19 plots on lymphocytes were used to identify  
175 total T cells (CD3+). Total T cells were further gated to identify CD4+ and CD8+ T cells. Activated  
176 CD4+ T cell population were identified by the expression of activation markers CD154 or CD69  
177 as described in our previous report (Aleman *et al.*, 2021). Total cytokine responses in CD4+ T  
178 cells were quantified by performing Boolean gating for each cytokine on activated CD4+ T cells.  
179 Events from each cytokine combination were pooled and divided by total CD4 T cells events to

180 calculate the frequency of total cytokine positive CD4+ T cells. Finally, SARS-CoV-2 spike-  
181 specific CD4+ T cell response was calculated by subtracting water control total cytokine  
182 frequencies from SARS-CoV-2 spike peptide-stimulated conditions. Negative values were  
183 designated as zero. PBMC from healthy donors prior to any SARS-CoV-2 vaccination or SARS-  
184 CoV-2 exposure were stimulated similarly and were used as a control group.

185

186 **Cells and SARS-CoV-2 isolates.** Vero-E6-TMPRSS2 cells were cultured in Dulbecco's modified  
187 Eagles medium (DMEM; Corning) supplemented 10% heat-inactivated fetal bovine serum (FBS;  
188 GeminiBio) and 1% minimum essential medium (MEM) amino acids solution (Gibco), 100 U/ml  
189 penicillin, 100 µg/ml streptomycin (Gibco), 100 µg/ml normocin (InvivoGen, #ant-nr), and 3 µg/ml  
190 puromycin (InvivoGen). The authentic SARS-CoV-2 virus (USA-WA1/2020;  
191 GenBank: [MT020880](#)) was obtained from BEI resources. (BEI resources, NR-52281). The  
192 B.1.1.529 isolate USA/NY-MSHSPSP-PV44488/2021 (BA.1, EPI\_ISL\_7908059) was previously  
193 described.(Carreno et al., 2022) Viruses were grown and tittered on Vero-E6-TMPRSS2 cells.

194

195 **SARS-CoV-2 multi-cycle microneutralization assay.** Serum samples from study participants  
196 were used to determine the neutralization of wild type (WA1), and B.1.1.529 (Omicron) SARS-  
197 CoV-2 isolates. All procedures were performed in a biosafety level 3 (BSL-3) facility at the Icahn  
198 School of Medicine at Mount Sinai following standard safety guidelines. The day before infection,  
199 Vero-E6-TMPRSS2 cells were seeded in 96-well high binding cell culture plates (Costar,  
200 #07620009) at a density of 20,000 cells/well in complete Dulbecco's modified Eagle medium  
201 (cDMEM) one day prior to the infection. After heat inactivation of sera (56°C for 1 hour), serum  
202 samples were serially diluted (3-fold) in minimum essential media (MEM; Gibco, #11430-030)  
203 supplemented with 2 mM L-glutamine (Gibco, #25030081), 0.1% sodium bicarbonate (w/v,  
204 HyClone), 10 mM 4-(2-hydroxyethyl)-1-piperazineethanesulfonic acid (HEPES), 100 /ml penicillin,  
205 100 µg/ml streptomycin (Gibco) and 0.2% bovine serum albumin (BSA, MP Biomedicals, Cat#.

206 810063) starting at 1:10. Remdesivir (Medkoo Bioscience Inc.) was included to monitor assay  
207 variation. Serially diluted sera were incubated with 10,000 TCID<sub>50</sub> of WT USA-WA1/2020 SARS-  
208 CoV-2, or USA/NY-MSHSPSP-PV44488/2021 (B.1.1.529, Omicron) for one hour at RT, followed  
209 by the transfer of 120µl of the virus-sera mix to Vero-E6-TMPRSS2 plates. Infection proceeded  
210 for one hour at 37°C and inoculum was removed. 100 µl/well of the corresponding antibody  
211 dilutions plus 100µl/well of infection media supplemented with 2% fetal bovine serum (FBS; Gibco,  
212 #10082-147) were added to the cells. Plates were incubated for 48h at 37°C followed by fixation  
213 overnight at 4°C in 200 µl/well of a 10% formaldehyde solution. For staining of the nucleoprotein,  
214 formaldehyde solution was removed, and cells were washed with PBS (pH 7.4) (Gibco) and  
215 permeabilized by adding 150 µl/well of PBS, 0.1% Triton X-100 (Fisher Bioreagents) for 15 min at  
216 RT. Permeabilization solution was removed, plates were washed with 200 µl/well of PBS (Gibco)  
217 twice and blocked with PBS, 3% BSA for 1 hour at RT. During this time the primary antibody was  
218 biotinylated according to manufacturer protocol (Thermo Scientific EZ-Link NHS-PEG4-Biotin).  
219 Blocking solution was removed and 100 µl/well of biotinylated mAb 1C7C7, a mouse anti-SARS  
220 nucleoprotein monoclonal antibody generated at the Center for Therapeutic Antibody  
221 Development at The Icahn School of Medicine at Mount Sinai ISMMS (Millipore Sigma) at a  
222 concentration of 1µg/ml in PBS, 1% BSA was added for 1 hour at RT. Cells were washed with  
223 200 µl/well of PBS twice and 100 µl/well of HRP-conjugated streptavidin (Thermo Fisher  
224 Scientific) diluted in PBS, 1% BSA were added at a 1:2,000 dilution for 1 hour at RT. Cells were  
225 washed twice with PBS, and 100 µl/well of o-phenylenediamine dihydrochloride (Sigmafast OPD;  
226 Sigma-Aldrich) were added for 10 min at RT, followed by addition of 50 µl/well of a 3 M HCl  
227 solution (Thermo Fisher Scientific). Optical density (OD) was measured (490 nm) using a  
228 microplate reader (Synergy H1; Biotek). Analysis was performed using Prism 9 software  
229 (GraphPad). After subtraction of background and calculation of the percentage of neutralization  
230 with respect to the “virus only” control, a nonlinear regression curve fit analysis was performed to  
231 calculate the 50% inhibitory dilution (ID<sub>50</sub>), with top and bottom constraints set to 100% and 0%

232 respectively. All samples were analyzed in a blinded manner. Viral isolates composition and  
233 methods are described in more detail in our previous publication (Carreno *et al.*, 2022).

234

235 **Statistical Analysis.** The Mann-Whitney U test was used to determine significance for all  
236 continuous variables that were non-parametrically distributed. Fisher's exact test was used to  
237 determine significance in outcome measures. A two-sided alpha < 0.05 was considered  
238 statistically significant. Differences between continuous variables and contingency variables were  
239 done using R (v4.0.2). All statistical tests were run with R (v4.0.2).

240

241 **Supplemental References:**

242 Aleman, A., Upadhyaya, B., Tuballes, K., Kappes, K., Gleason, C.R., Beach, K., Agte, S.,  
243 Srivastava, K., Group, P.V.S.S., Van Oekelen, O., et al. (2021). Variable cellular  
244 responses to SARS-CoV-2 in fully vaccinated patients with multiple myeloma. *Cancer*  
245 *Cell* 39, 1442-1444.

246 Carreno, J.M., Alshammary, H., Tcheou, J., Singh, G., Raskin, A.J., Kawabata, H.,  
247 Sominsky, L.A., Clark, J.J., Adelsberg, D.C., Bielak, D.A., et al. (2022). Activity of  
248 convalescent and vaccine serum against SARS-CoV-2 Omicron. *Nature* 602, 682-688.

249 Herrera, N.G., Morano, N.C., Celikgil, A., Georgiev, G.I., Malonis, R.J., Lee, J.H., Tong,  
250 K., Vergnolle, O., Massimi, A.B., Yen, L.Y., et al. (2021). Characterization of the SARS-  
251 CoV-2 S Protein: Biophysical, Biochemical, Structural, and Antigenic Analysis. *ACS*  
252 *Omega* 6, 85-102.

253 Stadlbauer, D., Amanat, F., Chromikova, V., Jiang, K., Strohmeier, S., Arunkumar, G.A.,  
254 Tan, J., Bhavsar, D., Capuano, C., Kirkpatrick, E., et al. (2020). SARS-CoV-2

255 Seroconversion in Humans: A Detailed Protocol for a Serological Assay, Antigen  
256 Production, and Test Setup. *Curr Protoc Microbiol* 57, e100.

257 Stadlbauer, D., Tan, J., Jiang, K., Hernandez, M.M., Fabre, S., Amanat, F., Teo, C.,  
258 Arunkumar, G.A., McMahon, M., Capuano, C., et al. (2021). Repeated cross-sectional  
259 sero-monitoring of SARS-CoV-2 in New York City. *Nature* 590, 146-150.

260

261
